# Supplementary material for: Genome-Wide Copy Number Variation Analysis in Extended Families and Unrelated Individuals Characterized for Musical Aptitude and Creativity in Music
Source: PLoS One. 2013 Feb 27;8(2):e56356. doi: 10.1371/journal.pone.0056356 (PMC3584088; doi:10.1371/journal.pone.0056356)
Supplement: Table S3 — All CNVRs ranked for creative functions in music in the five study families. (XLS) [file pone.0056356.s003.xls]

## Sheet: Sheet1
	CNVR occurrences in Creative subjects within families						CNVR occurrences in non-Creative subjects within families
CNVR	fam6_creative	fam13_creative	fam14_creative	fam15_creative	fam17_creative		fam6_non	fam13_non	fam14_non	fam15_non	fam17_non		Cytoband	Gene_Names
chr8:115641238-115642408	0	1	1	0	0		1	3	0	0	1		8q23.3	NOT_FOUND
chr2:195979780-195982450	0	2	2	0	0		0	3	2	1	2		2q32.3	NOT_FOUND
chr7:110183622-110192161	0	1	0	0	0		1	1	0	0	1		7q31.1	NOT_FOUND
chr2:208355809-208363062	0	1	2	0	0		1	3	0	1	1		2q33.3	NOT_FOUND
chr8:72215550-72217690	0	1	0	0	0		0	3	2	1	1		8q13.3	EYA1
chr8:51031221-51040022	0	1	0	1	0		3	1	1	0	0		8q11.21	SNTG1
chr8:108839030-108841582	0	3	0	0	0		0	4	0	0	0		8q23.1	NOT_FOUND
chr5:117390364-117393156	0	1	1	2	0		1	2	0	2	5		5q23.1	NOT_FOUND
chr13:34140341-34143545	0	4	2	1	0		0	3	0	1	0		13q13.2	NOT_FOUND
chr6:19045560-19048773	0	1	1	0	0		0	0	2	0	1		6p22.3	NOT_FOUND
chr6:75346425-75349672	0	1	0	0	0		0	2	0	0	0		6q13	NOT_FOUND
chr18:58491809-58495329	0	1	0	0	0		0	0	0	0	0		18q21.32	NOT_FOUND
chr5:151514956-151518810	0	1	0	0	0		0	5	1	0	0		5q33.1	NOT_FOUND
chr2:213183696-213191389	0	1	0	0	0		0	0	0	2	1		2q34	ERBB4
chr15:61687640-61692518	0	1	0	0	0		0	1	0	0	0		15q22.2	NOT_FOUND
chr1:111929295-111934304	0	1	0	1	0		0	1	0	3	0		1p13.2	PGCP1
chr16:28615243-28620752	0	1	1	0	2		0	0	1	1	5		16p11.2	SULT1A1
chr8:5599399-5605087	0	2	4	0	0		2	2	1	2	2		8p23.2	NOT_FOUND
chr21:23655900-23661835	0	1	1	2	0		0	1	1	1	0		21q21.1	NOT_FOUND
chr12:59935026-59942122	1	2	2	1	1		5	3	1	1	4		12q14.1	NOT_FOUND
chr9:135947165-135957452	0	1	0	0	0		0	0	0	2	0		9q34.2	CEL
chr3:37979882-37986249	1	1	0	1	2		3	0	0	1	0		3p22.2	CTDSPL
chr5:155477866-155488438	0	4	10	1	0		2	5	3	1	3		5q33.2	NOT_FOUND
chr4:138171595-138190394	0	2	0	0	0		0	4	0	0	0		4q28.3	NOT_FOUND
chr4:108065738-108083471	0	1	0	0	0		1	7	0	0	0		4q25	NOT_FOUND
chr6:29855945-29896421	1	2	1	0	0		2	3	0	2	2		6p22.1	HCG4B,HLA-H
chr2:41240080-41248468	0	2	0	0	0		0	4	0	1	6		2p22.1	NOT_FOUND
chr2:4211781-4224068	0	1	5	1	2		3	1	1	1	4		2p25.3	NOT_FOUND
chr2:38955129-38977612	1	1	3	3	0		2	1	0	2	3		2p22.1	GALM,SRSF7
chr7:109441794-109451230	0	1	1	0	0		0	1	0	2	1		7q31.1	NOT_FOUND
chr1:153913684-153923276	0	1	0	0	0		0	0	0	0	0		1q21.3	CRTC2,DENND4B
chr4:113044027-113055291	0	1	0	0	0		0	0	0	0	0		4q25	NOT_FOUND
chr17:54160465-54172277	0	1	1	0	0		2	1	0	0	0		17q22	NOT_FOUND
chr22:39428919-39443403	0	1	0	0	0		0	2	0	0	0		22q13.1	APOBEC3D,APOBEC3F
chr4:161028817-161071059	0	1	0	0	0		2	3	0	2	0		4q32.1	NOT_FOUND
chr18:7174604-7188754	0	1	0	0	0		0	1	0	0	0		18p11.23	NOT_FOUND
chr3:89329632-89417171	0	2	0	0	0		0	5	0	1	1		3p11.1	EPHA3
chr6:5555588-5575967	0	1	0	0	1		0	0	0	1	3		6p25.1	FARS2
chr2:77977262-77998681	0	1	0	0	0		0	0	0	0	0		2p12	NOT_FOUND
chr2:34699812-34726904	0	3	9	1	1		2	2	4	4	4		2p22.3	NOT_FOUND
chr16:85768171-85790981	0	1	0	0	0		0	0	0	0	0		16q24.1	C16orf74,MIR1910
chr1:248802001-248907678	0	1	0	0	0		0	0	0	0	2		1q44	LOC646627,OR14I1,OR2T27,OR2T35
chr12:31266287-31409778	0	5	0	0	0		0	6	0	0	5		12p11.21	NOT_FOUND
chr14:19255726-20420338	0	2	11	2	2		3	0	6	2	2		14q11.2	OR11H12,OR11H2,OR4K1,OR4K2,OR4K5,OR4M1,OR4N2,OR4Q3,POTEG,POTEM
chr11:58820988-58846985	0	3	0	0	0		0	7	0	0	0		11q12.1	LOC283194
chr6:78972930-79029367	0	2	8	4	4		5	8	7	11	15		6q14.1	NOT_FOUND
chr13:95999739-96032939	0	1	0	0	0		0	3	0	1	0		13q32.1	NOT_FOUND
chr2:215510824-215546304	0	1	0	0	0		0	1	0	0	2		2q35	NOT_FOUND
chr1:196723047-196904450	0	1	0	1	0		0	2	0	2	0		1q31.3	CFHR1,CFHR3,CFHR4
chr22:25661725-25962988	0	2	1	0	0		0	0	1	0	0		22q12.1-q11.23	ADRBK2,CRYBB2P1,IGLL3P,LRP5L
chr15:43888976-43990211	0	1	0	0	0		0	0	0	0	0		15q15.3	CATSPER2,CKMT1A,CKMT1B,STRC
chr13:95937149-95983387	0	1	0	0	0		0	3	0	1	0		13q32.1	ABCC4
chr5:788646-840717	0	1	8	0	2		0	3	2	1	2		5p15.33	ZDHHC11
chr13:84101480-84175115	0	2	0	4	0		1	6	2	4	2		13q31.1	NOT_FOUND
chr1:25598276-25655538	0	1	2	1	0		1	2	0	1	2		1p36.11	RHD
chr11:55365761-55909847	0	2	10	4	0		7	3	8	8	14		11q12.1-q11	OR10AG1,OR4C11,OR4C6,OR4P4,OR4S2,OR5AS1,OR5D13,OR5D14,OR5D16,OR5D18,OR5F1,OR5I1,OR5L1,OR5L2,OR5W2,OR7E5P,OR8H2,OR8H3,OR8I2,OR8J3,SPRYD5
chr1:104103057-104211046	0	1	10	2	3		6	1	6	8	10		1p21.1	AMY1A,AMY1B,AMY1C,AMY2A,AMY2B,LOC648740
chr16:16219729-16291983	0	1	0	0	0		0	0	0	0	0		16p13.11	ABCC1,ABCC6
chr2:99839539-99913998	0	1	0	0	0		0	0	0	1	0		2q11.2	LYG1,LYG2
chr17:33684035-33768199	0	1	0	0	0		0	1	0	1	0		17q12	SLFN11,SLFN12,SLFN13
chr19:20621828-20715228	0	1	0	1	1		1	0	0	1	5		19p12	NOT_FOUND
chr17:34443811-34597521	1	1	9	0	2		0	4	3	2	5		17q12	CCL3L1,CCL3L3,CCL4L1,CCL4L2,TBC1D3B,TBC1D3C
chr2:89931911-90240473	0	1	2	0	0		0	1	2	0	1		2p11.2	NOT_FOUND
chr2:242873800-243048760	0	2	0	0	0		0	1	0	1	0		2q37.3	LOC728323
chr8:137682484-137857327	0	1	0	0	1		0	1	0	0	0		8q24.23	NOT_FOUND
chr1:102667388-102846147	0	1	0	0	0		0	0	0	1	1		1p21.1	NOT_FOUND
chr12:100278040-100462609	0	1	0	0	0		0	0	0	0	0		12q23.1	ANKS1B,UHRF1BP1L
chr22:22314463-22573637	0	2	0	0	0		0	7	0	0	0		22q11.22	TOP3B
chr20:60293268-60294388	0	0	0	0	0		0	1	0	0	0		20q13.33	CDH4
chr3:98946071-98947275	0	0	0	1	1		1	1	0	0	3		3q12.1	NOT_FOUND
chr12:12439062-12440378	0	0	0	0	0		1	1	0	0	0		12p13.2	NOT_FOUND
chr12:70680393-70681814	0	0	0	0	0		1	1	0	0	0		12q15	CNOT2
chr4:35149660-35151237	0	0	0	0	0		0	1	0	0	0		4p15.1	NOT_FOUND
chr11:134359194-134721471	0	0	1	1	0		0	1	0	3	4		11q25	LOC283177
chr13:85802402-85804087	0	0	0	0	0		0	1	0	0	0		13q31.1	NOT_FOUND
chr5:70305696-70307464	0	0	1	1	0		0	2	2	1	0		5q13.2	NAIP
chr7:97351623-97432533	0	0	3	1	1		1	2	1	1	3		7q21.3	TAC1
chr1:86402185-86412177	0	0	0	0	0		1	1	0	0	0		1p22.3	COL24A1
chr3:6651929-6659688	0	0	1	0	1		2	1	2	0	1		3p26.1	NOT_FOUND
chr3:189364424-189375694	0	0	1	1	2		2	1	1	3	4		3q28	TP63
chr10:59210800-59213174	0	0	0	0	0		0	1	0	0	0		10q21.1	NOT_FOUND
chr13:59374021-59376406	0	0	0	0	0		0	1	0	2	0		13q21.1	NOT_FOUND
chr10:58517273-58519671	0	0	0	0	0		2	2	0	0	0		10q21.1	NOT_FOUND
chr3:148964692-148967335	0	0	4	0	1		0	1	1	0	2		3q25.1	NOT_FOUND
chr3:163661532-163664285	0	0	0	0	0		0	1	0	0	0		3q26.1	NOT_FOUND
chr9:2148213-2151194	0	0	0	0	0		0	1	0	0	2		9p24.3	SMARCA2
chr12:33293907-33305855	0	0	4	0	0		3	2	2	0	3		12p11.21-p11.1	NOT_FOUND
chr4:10396709-10400156	1	0	1	1	1		1	1	1	3	5		4p16.1	NOT_FOUND
chr11:37458347-37461807	0	0	2	0	0		0	1	0	1	0		11p12	NOT_FOUND
chr4:138093809-138097449	0	0	0	0	0		0	1	1	1	0		4q28.3	NOT_FOUND
chr13:21728134-21732094	0	0	1	1	0		0	1	0	2	0		13q12.11	SKA3
chr18:63199565-63205702	0	0	0	0	0		2	2	0	1	0		18q22.1	NOT_FOUND
chr7:111955948-111960100	0	0	0	0	0		0	3	0	0	0		7q31.1	ZNF277
chr3:9363272-9367619	0	0	0	0	0		0	2	0	0	0		3p25.3	NOT_FOUND
chr3:191065392-191072060	1	0	0	0	2		0	3	2	0	7		3q28	CCDC50
chr9:107370498-107375659	0	0	0	0	0		0	1	0	1	0		9q31.1	NOT_FOUND
chr1:107656356-107661606	0	0	0	0	0		0	1	0	0	0		1p13.3	NOT_FOUND
chr12:30237954-30243631	0	0	1	0	1		1	1	0	0	0		12p11.22	NOT_FOUND
chr11:93023382-93028940	0	0	0	0	0		0	2	0	0	0		11q21	NOT_FOUND
chr5:97933888-97939616	0	0	0	0	0		2	1	0	0	0		5q15	NOT_FOUND
chr5:7178644-7191074	0	0	0	0	0		0	1	0	0	0		5p15.31	NOT_FOUND
chr5:98090590-98096735	0	0	0	0	0		0	1	0	0	0		5q15	NOT_FOUND
chr13:23546238-23553518	0	0	0	0	0		0	1	0	0	3		13q12.12	NOT_FOUND
chr6:81284507-81291150	0	0	1	0	1		1	2	0	1	4		6q14.1	NOT_FOUND
chr10:20850624-20857365	1	0	1	0	0		0	1	2	0	0		10p12.31	NOT_FOUND
chr8:9055708-9062490	0	0	0	0	0		0	1	0	0	0		8p23.1	NOT_FOUND
chr6:21827104-21834059	0	0	0	0	0		0	2	0	2	0		6p22.3	FLJ22536
chr8:47528414-47535597	0	0	0	0	0		0	1	0	0	0		8q11.1	NOT_FOUND
chr8:15402936-15410250	0	0	0	0	0		0	1	0	0	0		8p22	TUSC3
chr11:18949220-18956690	0	0	0	2	0		0	3	0	1	2		11p15.1	MRGPRX1
chr19:54729050-54743217	0	0	3	1	1		0	1	2	3	1		19q13.42	LILRA6
chr2:76941049-76949101	0	0	1	0	2		2	1	7	0	4		2p12	NOT_FOUND
chr8:85257540-85272419	0	0	4	0	0		2	1	0	2	1		8q21.2	RALYL
chr11:49704930-49737165	1	0	0	0	0		1	1	0	0	0		11p11.12	LOC440040
chr6:77439969-77448731	0	0	1	0	0		1	1	2	0	0		6q14.1	NOT_FOUND
chr15:86511690-86521133	0	0	0	0	0		2	1	0	0	0		15q25.3	NOT_FOUND
chr5:101019270-101096015	1	0	2	0	0		3	4	3	0	1		5q21.1	NOT_FOUND
chr21:44823479-44837555	0	0	0	0	0		2	1	0	0	0		21q22.3	SIK1
chr6:31785453-31795082	0	0	0	0	0		0	1	0	0	0		6p21.33	HSPA1A
chr19:3586471-3599984	0	0	0	0	0		0	1	0	0	0		19p13.3	GIPC3,TBXA2R
chr1:213002088-213020221	0	0	0	0	0		0	2	0	0	0		1q32.3	C1orf227
chr7:52733291-52743803	1	0	2	1	2		1	1	2	1	3		7p12.1	NOT_FOUND
chr17:62773261-62784028	0	0	0	0	0		0	1	0	0	0		17q24.1	LOC146880,PLEKHM1P
chr6:80558480-80569885	0	0	0	0	0		1	2	0	0	0		6q14.1	NOT_FOUND
chr3:162130691-162142475	0	0	2	0	0		1	1	0	0	0		3q26.1	NOT_FOUND
chr11:81503992-81517261	0	0	1	1	0		0	1	0	2	0		11q14.1	NOT_FOUND
chr4:64125181-64150666	0	0	0	0	0		0	1	0	1	3		4q13.1	NOT_FOUND
chr3:76172232-76197852	0	0	1	0	0		0	1	0	0	0		3p12.3	NOT_FOUND
chr2:18327703-18340920	0	0	0	0	0		1	1	0	0	0		2p24.2	NOT_FOUND
chr3:175893082-175907342	0	0	0	0	0		0	1	0	0	0		3q26.32	NOT_FOUND
chr6:110396540-110420374	0	0	0	0	0		0	2	0	0	0		6q21	NOT_FOUND
chr2:78703629-78718429	0	0	0	0	0		0	1	0	0	0		2p12	NOT_FOUND
chr15:97808761-97830540	0	0	0	1	0		0	2	0	0	0		15q26.2	NOT_FOUND
chr21:18035045-18050542	0	0	0	0	0		0	1	0	0	0		21q21.1	NOT_FOUND
chr1:752566-768448	0	0	0	0	0		0	1	0	0	0		1p36.33	LOC643837,NCRNA00115
chr6:142377095-142395720	0	0	0	0	0		0	1	0	0	0		6q24.1	NOT_FOUND
chr10:81577614-81984564	0	0	0	0	0		1	2	0	0	0		10q22.3	ANXA11,C10orf57,LOC100288974,LOC219347,LOC439990,LOC642361,MBL1P,PLAC9,SFTPD
chr3:65191847-65214685	0	0	4	1	2		3	4	1	4	4		3p14.1	NOT_FOUND
chr19:56694505-56717353	0	0	0	0	0		0	1	0	0	0		19q13.43	GALP,ZSCAN5B
chr5:104274431-104300802	0	0	1	0	0		0	1	3	0	0		5q21.2	NOT_FOUND
chr6:67017494-67047294	0	0	8	1	0		0	2	1	8	3		6q12	NOT_FOUND
chr15:20612840-21203523	1	0	0	0	1		2	2	1	0	2		15q11.1-q11.2	GOLGA6L6,GOLGA8C,HERC2P3,LOC348120,NBEAP1,NF1P1,POTEB
chr6:56920804-56954518	0	0	0	0	0		0	1	0	0	0		6p12.1	NOT_FOUND
chr8:128496506-128531028	0	0	0	0	0		0	1	0	0	1		8q24.21	NOT_FOUND
chr16:75539436-75618058	0	0	0	0	0		0	1	0	0	0		16q23.1	CHST5,GABARAPL2,TMEM231
chr7:33133742-33185898	0	0	0	0	0		0	2	0	0	0		7p14.3	BBS9,RP9
chr17:46738883-46780829	0	0	0	0	0		0	1	0	0	0		17q21.32	NOT_FOUND
chr17:44525764-44665999	0	0	0	1	0		0	1	0	1	0		17q21.31	ARL17A,LRRC37A2
chr8:92107070-92183658	0	0	0	0	0		0	2	0	2	0		8q21.3	LRRC69
chr1:49928063-49990335	0	0	0	0	0		1	2	1	0	0		1p33	AGBL4
chr4:71566-127452	0	0	0	0	0		0	1	0	1	1		4p16.3	ZNF595,ZNF718
chr6:32493790-32560859	1	0	4	1	0		4	1	4	1	1		6p21.32	HLA-DRB1,HLA-DRB5,HLA-DRB6
chr15:24446977-24728780	0	0	0	0	0		0	4	0	0	1		15q11.2	NOT_FOUND
chr16:70170186-70231681	0	0	0	0	0		0	1	0	0	0		16q22.1	CLEC18C,PDPR
chr3:161883401-161944949	0	0	0	0	0		0	1	0	0	0		3q26.1	NOT_FOUND
chr7:111044377-111215458	0	0	0	0	0		0	1	0	0	0		7q31.1	IMMP2L
chr3:100351696-100441716	0	0	0	0	0		0	1	0	0	0		3q12.2	GPR128,TFG
chr1:12850542-12961019	1	0	0	0	0		1	1	2	2	1		1p36.21	HNRNPCL1,LOC649330,PRAMEF1,PRAMEF10,PRAMEF11,PRAMEF2,PRAMEF4
chr19:28351234-28451827	0	0	0	0	0		0	1	2	0	1		19q11	NOT_FOUND
chr1:189238665-189343623	0	0	0	1	0		0	1	0	1	0		1q31.1	NOT_FOUND
chr3:26046361-26160044	0	0	0	0	0		0	1	0	0	0		3p24.2	NOT_FOUND
chr6:140931910-141058627	0	0	0	0	0		0	1	0	0	0		6q24.1	MIR4465
chr16:34416833-34747045	0	0	1	0	0		0	1	1	1	1		16p11.1-p11.2	LOC100130700,LOC146481,LOC283914
chr1:149039031-149388389	0	0	9	0	2		5	3	3	6	10		1q21.2	FCGR1C,LOC388692
chr15:22299434-22576118	0	0	1	0	0		0	1	0	2	0		15q11.2	LOC727924,OR4M2,OR4N3P,OR4N4,REREP3
chr6:95354276-95676106	0	0	1	0	0		0	1	0	3	0		6q16.1	NOT_FOUND
chr3:75419736-75636449	0	0	0	0	0		2	1	0	0	5		3p12.3	FAM86DP
chr3:1782524-1787581	1	0	4	0	0		1	0	1	0	0		3p26.3	NOT_FOUND
chr5:106229524-106230898	0	0	2	0	0		0	0	1	0	0		5q21.3	NOT_FOUND
chr5:8258881-8260630	0	0	3	0	1		0	0	0	0	0		5p15.31	NOT_FOUND
chr3:165265189-165267688	0	0	1	0	0		0	0	0	0	0		3q26.1	NOT_FOUND
chr9:10144584-10147116	0	0	3	0	0		0	0	0	0	0		9p23	PTPRD
chr2:184797826-184802609	0	0	3	0	0		0	0	2	1	0		2q32.1	NOT_FOUND
chr1:206317334-206329582	0	0	1	0	0		0	0	0	0	0		1q32.1	CTSE
chr2:40420129-40424444	0	0	2	0	0		0	0	0	0	0		2p22.1	LOC100128590,SLC8A1
chr1:174209978-174802731	0	0	1	0	0		1	0	0	0	0		1q25.1	GPR52,RABGAP1L
chr12:126994335-126998184	1	0	3	0	0		2	0	0	0	0		12q24.32	NOT_FOUND
chr4:116168158-116173928	0	0	1	0	0		0	0	1	0	0		4q26	NOT_FOUND
chr4:42869436-42874286	0	0	3	0	0		0	0	0	0	0		4p13	NOT_FOUND
chr15:32018731-32833659	0	0	1	0	0		0	0	2	2	3		15q13.3	CHRNA7,FAM7A1,FAM7A2,FAM7A3,LOC100288615
chr7:141761438-141793419	0	0	1	0	0		0	0	0	0	1		7q34	MGAM
chr20:17081682-17086391	0	0	4	0	0		0	0	0	0	0		20p12.1	NOT_FOUND
chr19:35856925-35861695	0	0	1	0	0		0	0	0	0	0		19q13.12	NOT_FOUND
chr16:19950501-19955468	0	0	5	0	2		0	0	1	0	1		16p12.3	NOT_FOUND
chr4:122283523-122291131	0	0	3	1	0		1	0	1	1	1		4q27	QRFPR
chr7:150553475-150560322	0	0	2	0	0		0	0	1	0	0		7q36.1	ABP1
chr21:23213331-23218791	0	0	1	0	0		0	0	0	0	0		21q21.1	NOT_FOUND
chr17:65832576-65838743	0	0	1	0	0		0	0	2	0	0		17q24.2	BPTF
chr5:167082005-167088437	0	0	3	0	0		0	0	2	0	0		5q34	ODZ2
chr12:2245636-2252924	0	0	2	0	0		4	0	1	0	1		12p13.33	CACNA1C
chr5:140225908-140237548	0	0	2	0	0		2	0	5	3	1		5q31.3	PCDHA1,PCDHA10,PCDHA2,PCDHA3,PCDHA4,PCDHA5,PCDHA6,PCDHA7,PCDHA8,PCDHA9
chr18:66747568-66755508	0	0	2	0	0		2	0	1	0	2		18q22.1	NOT_FOUND
chr1:203910220-203918270	0	0	5	0	0		0	0	3	0	0		1q32.1	NOT_FOUND
chr20:59569516-59589272	0	0	3	0	0		0	0	1	1	0		20q13.33	NOT_FOUND
chr15:25420978-25436151	0	0	1	0	0		0	0	0	0	0		15q11.2	SNORD115-10,SNORD115-11,SNORD115-12,SNORD115-29,SNORD115-36,SNORD115-4,SNORD115-43,SNORD115-5,SNORD115-6,SNORD115-7,SNORD115-8,SNORD115-9
chr10:82879719-82895519	1	0	5	0	0		3	0	6	0	0		10q23.1	NOT_FOUND
chr3:90313394-90493882	0	0	1	0	0		0	0	0	1	0		3p11.1	NOT_FOUND
chr14:24453366-24484060	0	0	6	0	0		3	0	3	2	1		14q11.2	DHRS4L2
chr4:58053743-58100571	0	0	2	0	0		0	0	1	0	0		4q12	LOC255130
chr5:180176497-180190328	0	0	1	0	0		0	0	0	0	0		5q35.3	NOT_FOUND
chr16:3705015-3718848	0	0	1	0	0		0	0	0	0	0		16p13.3	DNASE1,TRAP1
chr16:68803222-68817439	0	0	2	0	0		0	0	0	1	0		16q22.1	CDH1
chr6:49420560-49446509	0	0	1	0	0		0	0	0	0	0		6p12.3	CENPQ,MUT
chr8:66992737-67008429	0	0	1	1	0		0	0	1	0	0		8q13.1	DNAJC5B
chr20:29804293-29820178	0	0	1	0	0		0	0	0	1	0		20q11.21	NOT_FOUND
chr8:34838513-34854498	0	0	2	0	0		0	0	0	0	0		8p12	NOT_FOUND
chr6:55828727-55846527	0	0	1	1	1		1	0	0	1	6		6p12.1	NOT_FOUND
chr10:56448886-56467563	0	0	2	0	0		0	0	0	0	0		10q21.1	PCDH15
chr3:128391789-128417293	0	0	2	0	0		0	0	4	0	8		3q21.3	NOT_FOUND
chr13:69247022-69267981	0	0	3	4	1		2	0	2	3	0		13q21.33	NOT_FOUND
chr14:74005928-74028117	0	0	3	0	0		0	0	0	0	0		14q24.3	ACOT1,HEATR4
chr10:20792026-20814415	0	0	1	0	0		0	0	0	0	0		10p12.31	NOT_FOUND
chr2:56634019-56656894	0	0	1	0	0		0	0	0	0	2		2p16.1	NOT_FOUND
chr8:1526557-1551838	0	0	10	0	0		0	0	1	0	0		8p23.3	DLGAP2
chr14:42413647-42438099	0	0	3	0	0		0	0	0	0	0		14q21.1	NOT_FOUND
chr10:47412588-47703869	0	0	3	0	2		1	0	0	1	1		10q11.22	ANTXRL,FAM35B2
chr3:8826396-8857963	0	0	4	0	0		0	0	5	0	0		3p25.3	NOT_FOUND
chr22:43170492-43203137	0	0	4	0	0		0	0	0	0	0		22q13.2	ARFGAP3
chr19:53518747-53552296	0	0	1	0	2		0	0	0	2	5		19q13.41	ERVV-1,ERVV-2
chr4:189081654-189115231	0	0	1	0	0		0	0	1	0	0		4q35.2	NOT_FOUND
chr6:124434003-124474595	0	0	1	0	0		0	0	0	0	1		6q22.31	NKAIN2
chr15:87831146-87870024	0	0	2	0	0		0	0	0	0	0		15q25.3	NOT_FOUND
chr14:46024675-46065326	0	0	2	0	0		0	0	0	0	0		14q21.2	NOT_FOUND
chr5:8703085-8744557	0	0	6	0	1		0	0	6	1	0		5p15.31	NOT_FOUND
chr11:99525126-99566782	0	0	1	0	0		0	0	1	0	0		11q22.1	CNTN5
chr14:106047905-106199579	0	0	1	0	0		0	0	0	0	8		14q32.33	NOT_FOUND
chr3:82010-126209	0	0	3	1	0		0	0	0	2	0		3p26.3	NOT_FOUND
chr8:28139238-28198159	0	0	3	0	0		0	0	0	0	0		8p21.1	PNOC
chr5:32101400-32159517	0	0	1	0	0		0	0	4	0	0		5p13.3	GOLPH3,PDZD2
chr1:163758093-163817001	0	0	1	0	0		0	0	1	0	0		1q23.3	NOT_FOUND
chr2:49653672-49744060	0	0	1	2	0		0	0	2	0	0		2p16.3	NOT_FOUND
chr9:67693021-67769541	0	0	1	0	0		0	0	0	0	0		9q13	NOT_FOUND
chr11:55365761-56003589	0	0	5	0	0		1	0	3	3	1		11q12.1-q11	OR10AG1,OR4C11,OR4C6,OR4P4,OR4S2,OR5AS1,OR5D13,OR5D14,OR5D16,OR5D18,OR5F1,OR5I1,OR5J2,OR5L1,OR5L2,OR5T2,OR5W2,OR7E5P,OR8H2,OR8H3,OR8I2,OR8J3,OR8K5,SPRYD5
chr17:44165803-44368212	0	0	6	0	2		1	0	5	1	1		17q21.31	KIAA1267,LOC644246
chr15:34718594-34807851	0	0	3	2	0		1	0	1	1	3		15q14	GOLGA8A
chr2:34840837-34935781	0	0	8	0	0		0	0	4	0	0		2p22.3	NOT_FOUND
chr2:110852875-110980346	0	0	6	0	0		0	0	0	0	0		2q13	MALL,NCRNA00116,NPHP1
chr16:21608472-21839340	0	0	2	0	0		0	0	0	0	0		16p12.2	IGSF6,METTL9,OTOA,RRN3P1
chr8:27825560-28058868	0	0	1	0	0		0	0	0	0	0		8p21.1	C8orf80,ELP3,SCARA5
chr2:87414212-88037312	0	0	1	0	0		1	0	0	0	0		2p11.2	MIR4435-1,MIR4435-2,NCRNA00152
chr16:32137965-32648969	0	0	2	0	0		0	0	0	0	1		16p11.2	HERC2P4,LOC390705
chr9:73907625-73909871	0	0	0	3	0		0	0	3	3	1		9q21.12	NOT_FOUND
chr9:6701130-6705824	0	0	0	0	0		0	0	1	0	0		9p24.1	NOT_FOUND
chr7:61747794-62699114	0	0	0	0	0		1	0	2	2	0		7q11.21	NOT_FOUND
chr1:61567939-61574202	0	0	0	0	0		0	0	1	0	0		1p31.3	NFIA
chr18:10913663-10919989	0	0	0	0	0		0	0	1	0	0		18p11.21	FAM38B
chr18:67209141-67217271	1	0	0	0	0		1	0	1	0	0		18q22.2	DOK6
chr20:59113601-59122693	0	0	0	0	0		0	0	1	0	0		20q13.33	NOT_FOUND
chr7:143425361-143437434	1	0	0	0	0		1	0	3	0	1		7q35	FAM115C
chr4:160815681-160828500	0	0	0	0	0		0	0	1	0	0		4q32.1	NOT_FOUND
chr9:72100118-72115711	0	0	0	2	0		0	0	3	0	0		9q21.11	APBA1
chr14:46361344-46394200	0	0	0	0	0		0	0	2	0	0		14q21.2	NOT_FOUND
chr9:28542803-28568013	0	0	0	0	0		0	0	2	1	0		9p21.1	LINGO2
chr19:49399821-49416936	0	0	0	0	0		0	0	1	0	0		19q13.33	NUCB1,TULP2
chr19:55284497-55378008	0	0	0	0	0		3	0	1	1	2		19q13.42	KIR2DL1,KIR2DL4,KIR2DS4,KIR3DL1,KIR3DL2
chr10:57295962-57353468	0	0	0	0	0		0	0	1	0	0		10q21.1	NOT_FOUND
chr12:75008634-75028122	0	0	0	0	0		0	0	1	0	0		12q21.1	NOT_FOUND
chr2:81521290-81546274	0	0	0	0	0		0	0	1	0	0		2p12	NOT_FOUND
chr16:2699304-2743418	0	0	0	0	0		0	0	1	0	0		16p13.3	KCTD5,LOC100507321
chr6:57329013-57359377	0	0	0	0	0		0	0	1	0	0		6p11.2	PRIM2
chr3:151514590-151546041	0	0	0	0	0		0	0	1	1	0		3q25.1	AADAC,MIR548H2
chr19:474588-512568	0	0	0	0	0		0	0	1	0	0		19p13.3	C19orf20,MADCAM1,ODF3L2
chr3:173233354-173289281	0	0	0	0	0		0	0	1	0	0		3q26.31	NLGN1
chr4:58393319-58799916	0	0	0	0	0		0	0	1	0	0		4q12	NOT_FOUND
chr11:86304402-86306401	0	0	0	2	0		2	0	0	6	1		11q14.2	ME3
chr16:163667-507904	0	0	0	1	0		1	0	0	0	0		16p13.3	ARHGDIG,AXIN1,DECR2,HBA1,HBA2,HBM,HBQ1,HBZ,ITFG3,LOC100134368,LUC7L,MRPL28,NME4,NPRL3,PDIA2,RAB11FIP3,RGS11,TMEM8A
chr9:86203246-86206343	0	0	0	1	0		0	0	0	0	1		9q21.32	NOT_FOUND
chr8:40184872-40189549	0	0	0	1	0		0	0	0	0	1		8p11.21	NOT_FOUND
chr22:44564297-44569346	0	0	0	1	0		0	0	0	0	0		22q13.31	PARVB,PARVG
chr7:3611608-3618143	0	0	0	1	0		0	0	0	0	0		7p22.2	SDK1
chr4:42697553-42708694	0	0	0	3	0		1	0	0	1	0		4p13	NOT_FOUND
chr17:77365534-77394037	0	0	0	5	0		0	0	0	6	2		17q25.3	RBFOX3
chr3:162213876-162227870	0	0	0	1	1		0	0	0	3	1		3q26.1	NOT_FOUND
chr7:139969051-139983172	0	0	0	1	0		0	0	0	1	0		7q34	NOT_FOUND
chr10:33850943-33865825	0	0	0	1	0		0	0	0	0	0		10p11.22	NOT_FOUND
chr6:70246201-70262569	0	0	0	1	0		0	0	0	1	0		6q13	NOT_FOUND
chr5:2041665-2064969	0	0	0	1	0		0	0	0	2	0		5p15.33	NOT_FOUND
chr21:20054442-20078424	0	0	0	1	0		0	0	0	0	0		21q21.1	NOT_FOUND
chr7:111265262-111288373	0	0	0	1	0		1	0	0	2	0		7q31.1	NOT_FOUND
chr3:60333449-61661311	0	0	0	1	0		0	0	0	2	0		3p14.2	FHIT,PTPRG
chr1:154278799-154308641	0	0	0	1	0		0	0	0	2	0		1q21.3	AQP10,ATP8B2
chr4:32373939-32437731	0	0	0	1	0		0	0	0	0	0		4p15.1	NOT_FOUND
chr8:15948235-16021468	0	0	0	1	0		0	0	0	1	0		8p22	MSR1
chr17:26770723-26868735	0	0	0	1	0		0	0	0	0	0		17q11.2	FOXN1,SLC13A2
chr4:119567203-119665051	0	0	0	1	0		0	0	0	2	0		4q26	METTL14,SEC24D
chr12:8000336-8123306	0	0	0	2	0		1	0	0	2	0		12p13.31	SLC2A14,SLC2A3
chr1:71620851-71769465	0	0	0	1	0		0	0	0	1	0		1p31.1	NOT_FOUND
chr5:128298437-128303353	0	0	0	0	0		0	0	0	2	0		5q23.3	SLC27A6
chr16:31223549-31225405	0	0	0	0	0		0	0	0	1	0		16p11.2	TRIM72
chr10:70240115-70242717	0	0	0	0	0		0	0	0	1	0		10q21.3	SLC25A16
chr4:39709947-39713134	0	0	0	0	0		0	0	0	1	0		4p14	UBE2K
chr6:31337633-31341357	0	0	0	0	0		0	0	0	1	0		6p21.33	NOT_FOUND
chr4:151840850-151887280	0	0	0	0	0		0	0	0	2	0		4q31.3	LRBA
chr3:193136476-193140348	0	0	0	0	1		0	0	0	1	0		3q29	ATP13A4
chr2:129641434-129645321	0	0	0	0	0		0	0	0	1	0		2q14.3	NOT_FOUND
chr8:143854497-143859181	0	0	0	0	0		0	0	0	1	0		8q24.3	LYNX1
chr5:140098596-140103887	0	0	0	0	0		0	0	0	1	0		5q31.3	VTRNA1-2
chr12:27648411-27654546	0	0	0	0	0		0	0	0	1	0		12p11.23	C12orf70
chr6:31219869-31228972	0	0	0	0	0		0	0	0	2	0		6p21.33	NOT_FOUND
chr8:144460569-144468438	0	0	0	0	0		0	0	0	1	0		8q24.3	RHPN1
chr1:98200635-98209131	0	0	0	0	0		0	0	0	2	0		1p21.3	DPYD
chr7:44935-68920	0	0	0	0	0		1	0	0	2	0		7p22.3	NOT_FOUND
chr2:242658262-242668089	0	0	0	0	0		0	0	0	1	0		2q37.3	ING5
chr3:191655531-191666002	0	0	0	0	0		0	0	0	2	0		3q28	NOT_FOUND
chr8:145724275-145735382	0	0	0	0	0		0	0	0	1	0		8q24.3	GPT,MFSD3,PPP1R16A
chr13:23345328-23359525	0	0	0	0	0		0	0	0	2	0		13q12.12	NOT_FOUND
chr1:15783771-15796808	0	0	0	0	0		1	0	0	2	0		1p36.21	CELA2A
chr7:6339313-6353371	0	0	0	0	0		0	0	0	1	0		7p22.1	NOT_FOUND
chr9:137290725-137304915	0	0	0	0	0		0	0	0	1	0		9q34.2	RXRA
chr11:394005-408352	0	0	0	0	0		0	0	0	1	0		11p15.5	PKP3,SIGIRR
chr2:241623894-241708675	0	0	0	0	0		0	0	0	4	0		2q37.3	AQP12A,KIF1A
chr20:26271193-26293985	0	0	0	0	0		0	0	0	1	0		20p11.1	NOT_FOUND
chr14:50110319-50126153	0	0	0	0	0		0	0	0	1	0		14q21.3	POLE2
chr8:145578296-145639726	0	0	0	0	0		0	0	0	1	0		8q24.3	ADCK5,C8ORFK29,CPSF1,FBXL6,GPR172A,MIR1234,MIR939,SLC39A4
chr12:11521626-11551608	0	0	0	0	0		0	0	0	3	0		12p13.2	PRB2
chr14:86287347-86310164	0	0	0	0	0		0	0	0	1	1		14q31.3	NOT_FOUND
chr4:942006-965779	0	0	0	0	0		0	0	0	1	0		4p16.3	DGKQ,TMEM175
chr1:1264539-1288823	0	0	0	0	0		0	0	0	1	0		1p36.33	DVL1,MXRA8,TAS1R3
chr1:3406791-3431235	0	0	0	0	0		0	0	0	1	0		1p36.32	MEGF6
chr7:112443541-112469778	0	0	0	0	0		0	0	0	1	0		7q31.1	C7orf60
chr17:19438321-19546100	1	0	0	0	0		4	0	0	1	0		17p11.2	SLC47A1,SNORA59A,SNORA59B
chr20:60883273-60912117	0	0	0	0	0		0	0	0	1	0		20q13.33	ADRM1,LAMA5,MIR4758
chr20:62164304-62201784	0	0	0	0	0		0	0	0	1	0		20q13.33	C20orf195,PRIC285,PTK6,SRMS
chr6:137899792-137965418	0	0	0	0	0		0	0	0	3	0		6q23.3	NOT_FOUND
chr5:97047653-97099320	0	0	0	0	0		2	0	0	2	0		5q15	NOT_FOUND
chr9:105763301-105822396	0	0	0	0	0		0	0	0	2	0		9q31.1	CYLC2
chr2:45661586-45720658	0	0	0	0	0		0	0	0	1	0		2p21	SRBD1
chr10:70127696-70189934	0	0	0	0	0		0	0	0	1	0		10q21.3	DNA2,RUFY2
chr6:163068845-163159187	0	0	0	0	0		0	0	0	1	0		6q26	PACRG,PARK2
chr11:48397233-48942781	0	0	0	0	0		0	0	0	2	0		11p11.2-p11.12	OR4A47
chr11:3460621-3613163	0	0	0	0	0		0	0	0	2	0		11p15.4	NOT_FOUND
chr15:30556183-31089526	0	0	0	0	0		0	0	0	2	0		15q13.2	ARHGAP11B,CHRFAM7A,FAM7A1,FAM7A2,LOC100288637
chr10:42356527-42509794	0	0	0	0	0		0	0	0	1	0		10q11.21	NOT_FOUND
chr5:45983680-49522346	0	0	0	0	0		0	0	0	3	0		5p12-p11	NOT_FOUND
chr12:38072773-38359611	0	0	0	0	0		0	0	0	1	0		12q11-q12	NOT_FOUND
chr11:54695706-55362955	0	0	0	0	0		0	0	0	1	0		11q11	LOC440041,OR4A15,OR4A16,OR4C15,OR4C16,TRIM48
chr12:74367675-74550782	0	0	0	0	0		0	0	0	1	0		12q21.1	LOC100507377
chr6:161352698-161567333	0	0	0	0	0		2	0	0	1	0		6q26	AGPAT4,MAP3K4
chr15:22750305-23272733	0	0	0	0	0		0	0	0	1	0		15q11.2	CYFIP1,GOLGA8IP,LOC283683,NIPA1,NIPA2,TUBGCP5,WHAMMP3
chr15:93800425-95941948	0	0	0	0	0		0	0	0	1	1		15q26.1-q26.2	LOC400456,MCTP2
chr18:63729570-63730950	0	0	0	0	1		0	0	0	0	4		18q22.1	NOT_FOUND
chr6:32636063-32640336	0	0	0	0	1		0	0	0	0	0		6p21.32	NOT_FOUND
chr3:89670356-89675870	0	0	0	0	1		0	0	0	0	5		3p11.1	NOT_FOUND
chr7:38291851-38330810	0	0	0	0	2		0	0	0	0	0		7p14.1	TARP
chr2:209033557-209050447	0	0	0	0	1		0	0	0	0	8		2q34	C2orf80
chr2:216926214-216933792	0	0	0	0	3		0	0	0	0	9		2q35	PECR
chr16:79263935-79273682	0	0	0	0	1		0	0	0	0	0		16q23.2	NOT_FOUND
chr11:2250149-2283459	0	0	0	0	1		0	0	0	0	3		11p15.5	NOT_FOUND
chr19:43268493-43328006	0	0	0	0	1		1	0	0	0	0		19q13.2	LOC100289650,PSG8
chr1:153674704-153696665	0	0	0	0	1		0	0	0	0	2		1q21.3	NOT_FOUND
chr4:16413099-16428830	0	0	0	0	1		1	0	0	0	1		4p15.32	NOT_FOUND
chr20:44351421-44378173	0	0	0	0	2		0	0	0	0	0		20q13.12	SPINT4
chr2:123900548-123930041	0	0	0	0	2		0	0	0	0	1		2q14.3	NOT_FOUND
chr2:123780262-123809708	0	0	0	0	2		0	0	0	0	2		2q14.3	NOT_FOUND
chr10:68078481-68114481	0	0	0	0	1		2	0	0	0	11		10q21.3	CTNNA3
chr7:15318473-15359354	0	0	0	0	3		0	0	0	0	4		7p21.2	AGMO
chr4:161952228-162003624	0	0	0	0	1		1	0	0	0	1		4q32.2	NOT_FOUND
chr19:50681778-50760934	0	0	0	0	1		0	0	0	0	0		19q13.33	MYH14
chr1:121171208-121346616	0	0	0	0	1		2	0	0	0	0		1p11.2	EMBP1
chr13:37498944-37500101	0	0	0	0	0		0	0	0	0	1		13q13.3	NOT_FOUND
chr1:16367339-16378215	0	0	0	0	0		0	0	0	0	1		1p36.13	CLCNKB
chr3:53033295-53060637	0	0	0	0	0		0	0	0	0	3		3p21.1	SFMBT1
chr2:49535856-49537795	0	0	0	0	0		0	0	0	0	4		2p16.3	NOT_FOUND
chr13:32533830-32535996	0	0	0	0	0		1	0	0	0	1		13q13.1	NOT_FOUND
chr12:70874726-70877258	0	0	0	0	0		0	0	0	0	1		12q15	NOT_FOUND
chr6:69687698-69690567	0	0	0	0	0		0	0	0	0	2		6q12	BAI3
chr5:166196443-166199420	0	0	0	0	0		0	0	0	0	1		5q34	NOT_FOUND
chr4:161881000-161884036	0	0	0	0	0		0	0	0	0	1		4q32.2	NOT_FOUND
chr1:35107269-35110443	0	0	0	0	0		0	0	0	0	1		1p34.3	NOT_FOUND
chr6:33938403-33942228	0	0	0	0	0		0	0	0	0	1		6p21.31	NOT_FOUND
chr10:87954602-87959049	0	0	0	0	0		0	0	0	0	3		10q23.2	GRID1
chr4:25557047-25562386	0	0	0	0	0		0	0	0	0	1		4p15.2	NOT_FOUND
chr13:103347428-103354056	0	0	0	0	0		0	0	0	0	1		13q33.1	NOT_FOUND
chr11:104958571-104965587	0	0	0	0	0		0	0	0	0	1		11q22.3	CARD17,CASP1
chr3:192305208-192315067	0	0	0	0	0		0	0	0	0	1		3q29	FGF12
chr7:88653885-88662774	0	0	0	0	0		0	0	0	0	1		7q21.13	ZNF804B
chr19:37028543-37039069	0	0	0	0	0		0	0	0	0	2		19q13.12	ZNF529
chr11:107653081-107670228	0	0	0	0	0		2	0	0	0	4		11q22.3	SLC35F2
chr11:82357515-82370960	0	0	0	0	0		0	0	0	0	1		11q14.1	NOT_FOUND
chr19:41350895-41384578	1	0	0	0	0		1	0	0	0	2		19q13.2	CYP2A6,CYP2A7
chr2:231414688-231433237	0	0	0	0	0		0	0	0	0	1		2q37.1	NOT_FOUND
chr4:69414944-69434902	0	0	0	0	0		0	0	0	0	1		4q13.2	UGT2B15,UGT2B17
chr8:123532207-123556500	0	0	0	0	0		0	0	0	0	1		8q24.13	NOT_FOUND
chr8:83271395-83293872	0	0	0	0	0		0	0	0	0	1		8q21.13	NOT_FOUND
chr13:89815375-89840239	0	0	0	0	0		0	0	0	0	2		13q31.2	NOT_FOUND
chr21:21306330-21336088	0	0	0	0	0		0	0	0	0	1		21q21.1	NOT_FOUND
chr3:165026679-165073006	0	0	0	0	0		0	0	0	0	1		3q26.1	NOT_FOUND
chr20:14781684-14823472	0	0	0	0	0		0	0	0	0	1		20p12.1	MACROD2
chr17:56738919-56801778	0	0	0	0	0		1	0	0	0	4		17q22	RAD51C,TEX14
chr12:32004170-32056577	0	0	0	0	0		0	0	0	0	1		12p11.21	NOT_FOUND
chr3:45500950-45557707	0	0	0	0	0		0	0	0	0	1		3p21.31	LARS2
chr2:212356992-212414621	0	0	0	0	0		1	0	0	0	1		2q34	ERBB4
chr7:117917719-118062484	0	0	0	0	0		0	0	0	0	1		7q31.31	NOT_FOUND
chr1:102051020-102120197	0	0	0	0	0		0	0	0	0	1		1p21.2	NOT_FOUND
chr14:43939771-44061198	0	0	0	0	0		0	0	0	0	1		14q21.2	NOT_FOUND
chr18:65256094-65783646	0	0	0	0	0		0	0	0	0	2		18q22.1	LOC643542
chr5:5694586-5713766	1	0	0	0	0		1	0	0	0	0		5p15.32	NOT_FOUND
chr12:52845952-52862614	1	0	0	0	0		1	0	0	0	0		12q13.13	KRT6C
chr17:970413-1154536	1	0	0	0	0		1	0	0	0	0		17p13.3	ABR
chr22:37748394-37749731	0	0	0	0	0		1	0	0	0	0		22q13.1	NOT_FOUND
chr4:152789786-152792791	0	0	0	0	0		1	0	0	0	0		4q31.3	NOT_FOUND
chr12:6243616-6247564	0	0	0	0	0		2	0	0	0	0		12p13.31	NOT_FOUND
chr3:57585406-57588117	0	0	0	0	0		1	0	0	0	0		3p14.3	NOT_FOUND
chr8:3784833-3791362	0	0	0	0	0		4	0	0	0	0		8p23.2	CSMD1
chr19:57474120-57477482	0	0	0	0	0		1	0	0	0	0		19q13.43	NOT_FOUND
chr9:1447011-1450428	0	0	0	0	0		1	0	0	0	0		9p24.3	NOT_FOUND
chr17:2430126-2434024	0	0	0	0	0		1	0	0	0	0		17p13.3	NOT_FOUND
chr4:92280933-92284935	0	0	0	0	0		1	0	0	0	0		4q22.1	FAM190A
chr10:82937618-82941755	0	0	0	0	0		1	0	0	0	0		10q23.1	NOT_FOUND
chr11:7817512-7822222	0	0	0	0	0		1	0	0	0	0		11p15.4	OR5P2
chr7:8956393-9229882	0	0	0	0	0		1	0	0	0	0		7p21.3	NOT_FOUND
chr5:96657330-96663347	0	0	0	0	0		1	0	0	0	0		5q15	NOT_FOUND
chr14:47708397-47715621	0	0	0	0	0		1	0	0	0	0		14q21.3	MDGA2
chr8:2132561-2178596	0	0	0	0	0		1	0	0	0	0		8p23.3	NOT_FOUND
chr5:140795128-140807256	0	0	0	0	0		1	0	0	0	0		5q31.3	PCDHGA1,PCDHGA10,PCDHGA11,PCDHGA2,PCDHGA3,PCDHGA4,PCDHGA5,PCDHGA6,PCDHGA7,PCDHGA8,PCDHGA9,PCDHGB1,PCDHGB2,PCDHGB3,PCDHGB4,PCDHGB5,PCDHGB6,PCDHGB7,PCDHGB8P
chr10:83944705-83959179	0	0	0	0	0		1	0	0	0	0		10q23.1	NRG3
chr18:61294936-61315171	0	0	0	0	0		1	0	0	0	0		18q21.33	SERPINB4
chr12:772673-796131	0	0	0	0	0		4	0	0	0	0		12p13.33	NINJ2
chr4:44976703-45002987	0	0	0	0	0		2	0	0	0	0		4p12	NOT_FOUND
chr17:61954471-61983601	0	0	0	0	0		1	0	0	0	0		17q23.3	CSH1,GH2
chr10:107984320-108015496	0	0	0	0	0		1	0	0	0	0		10q25.1	NOT_FOUND
chr1:2117558-2156362	0	0	0	0	0		3	0	0	0	0		1p36.33	C1orf86
chr7:154904584-154941814	0	0	0	0	0		1	0	0	0	0		7q36.2	NOT_FOUND
chr10:43209711-43246795	0	0	0	0	0		1	0	0	0	0		10q11.21	NOT_FOUND
chr19:3804701-3842327	0	0	0	0	0		2	0	0	0	0		19p13.3	ZFR2
chr4:66589229-66629765	0	0	0	0	0		1	0	0	0	0		4q13.2-q13.1	NOT_FOUND
chr10:81374757-81419822	0	0	0	0	0		1	0	0	0	0		10q22.3	SFTPA1
chr4:94699009-94746370	0	0	0	0	0		1	0	0	0	0		4q22.2	NOT_FOUND
chr8:70912296-70962698	0	0	0	0	0		1	0	0	0	0		8q13.3	NOT_FOUND
chr10:96499710-96557336	0	0	0	0	0		2	0	0	0	0		10q23.33	CYP2C19
